# Supplementary material for: Axicabtagene ciloleucel compared to tisagenlecleucel for the treatment of aggressive B-cell lymphoma
Source: PubMed Central journal article supplement — Haematologica. 2022 Jun 30;108(1):110–21. doi: 10.3324/haematol.2022.280805 (PMC9827173; doi:10.3324/haematol.2022.280805), 2022-06-30
Supplement: 2022_280805_KWON_SUPPL.pdf [file 2022_280805_KWON_SUPPL.pdf]

# Axicabtagene ciloleucel compared to tisagenlecleucel for the treatment of aggressive B-cell lymphoma

Mi Kwon,<sup>1,2\*</sup> Gloria Iacoboni,<sup>3,4\*</sup> Juan Luis Reguera,<sup>5</sup> Lucía López Corral,<sup>6</sup> Rafael Hernani Morales,<sup>7</sup> Valentín Ortiz-Maldonado,<sup>8</sup> Manuel Guerreiro,<sup>9</sup> Ana Carolina Caballero,<sup>10</sup> María Luisa Guerra Domínguez,<sup>11</sup> Jose Maria Sanchez Pina,<sup>12</sup> Alberto Mussetti,<sup>13</sup> Juan Manuel Sancho,<sup>14</sup> Mariana Bastos-Oreiro,<sup>1,2</sup> Eva Catala,<sup>3,4</sup> Javier Delgado,<sup>5</sup> Hugo Luzardo Henriquez,<sup>11</sup> Jaime Sanz,<sup>9</sup> María Calbacho,<sup>12</sup> Rebeca Bailén,<sup>1,2</sup> Cecilia Carpio,<sup>3,4</sup> Jose Maria Ribera,<sup>14</sup> Anna Sureda,<sup>13</sup> Javier Briones,<sup>10</sup> Juan Carlos Hernandez-Boluda,<sup>7</sup> Nuria Martínez Cebrián,<sup>8</sup> Jose Luis Diez Martin,<sup>1,2,15</sup> Alejandro Martín<sup>6</sup> and Pere Barba<sup>3,4</sup> on behalf of GETH-TC (Spanish Group of Stem Cell Transplantation and Cell Therapy) and GELTAMO (Spanish Group of Lymphoma and Autologous Stem Cell Transplantation)

<sup>1</sup>Department of Hematology, Hospital General Universitario Gregorio Marañón, Madrid; <sup>2</sup>Instituto de Investigación Sanitaria Gregorio Marañón, Madrid; <sup>3</sup>Department of Hematology, Vall d'Hebron University Hospital, Experimental Hematology, Vall d'Hebron Institute of Oncology (VHIO), Vall d'Hebron Barcelona Hospital Campus, Barcelona; <sup>4</sup>Department of Medicine, Universitat Autònoma de Barcelona, Bellaterra; <sup>5</sup>Department of Hematology, Hospital Universitario Virgen del Rocío, Instituto de Biomedicina de Sevilla, Sevilla; <sup>6</sup>Department of Hematology, Hospital Clínico Universitario de Salamanca, IBSAL, Salamanca; <sup>7</sup>Department of Hematology, Hospital Clínico Universitario de Valencia, Instituto de Investigación Sanitaria INCLIVA, Valencia; <sup>8</sup>Department of Hematology, Hospital Clínic, Barcelona; <sup>9</sup>Department of Hematology, Hospital Universitario y Politécnico La Fe, Valencia; <sup>10</sup>Department of Hematology, Hospital de la Santa Creu i Sant Pau, Barcelona; <sup>11</sup>Department of Hematology, Hospital Universitario de Gran Canaria Doctor Negrín, Las Palmas de Gran Canaria; <sup>12</sup>Department of Hematology, Hospital Universitario 12 de Octubre, Madrid; <sup>13</sup>Department of Hematology, Hospital Duran i Reynals, Instituto Catalán de Oncología, Barcelona; <sup>14</sup>Department of Hematology, Hospital Universitari Germans Trias i Pujol, Instituto Catalán de Oncología, Josep Carreras Research Institute, Badalona and <sup>15</sup>Universidad Complutense de Madrid, Madrid, Spain

\*MK and GI contributed equally as co-first authors.

**Correspondence:** M. Kwon  
[mi.kwon@salud.madrid.org](mailto:mi.kwon@salud.madrid.org)

**Received:** February 7, 2022.

**Accepted:** June 17, 2022.

**Prepublished:** June 30, 2022.

<https://doi.org/10.3324/haematol.2022.280805>

©2023 Ferrata Storti Foundation

Published under a CC BY-NC license

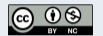

## Supplemental Material

**Table S1.** Characteristics of infused patients before lymphodepletion

|                                      | <b>Total<br/>infused<br/>n=261</b> | <b>Axi-cel<br/>infused<br/>n=134</b> | <b>Tisa-cel<br/>infused<br/>n=127</b> | <b>p</b> |
|--------------------------------------|------------------------------------|--------------------------------------|---------------------------------------|----------|
| <b>Bridging therapy, n (%)</b>       | 210 (80)                           | 104 (78)                             | 106 (83)                              | 0.275    |
| 1 Line                               | 194 (92)                           | 95 (71)                              | 99 (78)                               |          |
| 2 Lines                              | 16 (8)                             | 9 (7)                                | 7 (5)                                 |          |
| <b>ECOG, n (%)</b>                   |                                    |                                      |                                       | 0.319    |
| 0-1                                  | 244 (94)                           | 123 (92)                             | 121 (95)                              |          |
| 2-4                                  | 17 (6)                             | 11 (8)                               | 6 (5)                                 |          |
| <b>R-IPI prognostic score, n (%)</b> |                                    |                                      |                                       | 0.881    |
| 0-2                                  | 87 (33)                            | 51 (38)                              | 36 (28)                               |          |
| 3-5                                  | 95 (36)                            | 57 (43)                              | 38 (30)                               |          |
| NA                                   | 79 (30)                            | 26 (19)                              | 53 (42)                               |          |
| <b>Bulky disease, n (%)</b>          | 67 (26)                            | 41 (31)                              | 26 (20)                               | 0.248    |
| <b>Extranodal disease, n (%)</b>     |                                    |                                      |                                       | 0.051    |
| ≥ 2 sites                            | 47 (18)                            | 30 (22)                              | 17 (14)                               |          |
| <b>Disease status, n (%)</b>         |                                    |                                      |                                       | 0.625    |
| Progressive disease                  | 149 (57)                           | 81 (60)                              | 68 (54)                               |          |
| Stable disease                       | 43 (16)                            | 24 (18)                              | 19 (15)                               |          |
| Partial response                     | 25 (10)                            | 15 (11)                              | 10 (8)                                |          |
| Complete response                    | 11 (4)                             | 4 (3)                                | 7 (5)                                 |          |
| NA                                   | 33 (13)                            | 10 (8)                               | 23 (18)                               |          |
| <b>LDH &gt;ULN, n (%)</b>            | 143 (55)                           | 67 (50)                              | 76 (60)                               | 0.440    |
| <b>CRP &gt;ULN, n (%)</b>            | 154 (59)                           | 71 (53)                              | 83 (65)                               | 0.119    |
| <b>Platelets x10<sup>3</sup>/uL</b>  |                                    |                                      |                                       | 0.921    |
| Median (range)                       | 141.5 (119-558)                    | 142 (28-550)                         | 141 (19-558)                          |          |

Abbreviations: R-IPI, revised international prognostic index; NA, not available; LDH, lactate dehydrogenase, CRP, c-reactive protein; >ULN, upper limit of normal

**Tables S2.**

**A. Bridging therapy regimens used in axicabtagene ciloleucel and tisagenlecleucel–treated patients.**

|                                        | <b>Total<br/>infused<br/>n=261</b> | <b>Axi-cel<br/>infused<br/>n=134</b> | <b>Tisa-cel<br/>infused<br/>n=127</b> |
|----------------------------------------|------------------------------------|--------------------------------------|---------------------------------------|
| <b>Bridging therapy, n (%)</b>         | 210 (80)                           | 104 (78)                             | 106 (83)                              |
| Chemotherapy*                          | 127 (48)                           | 64 (48)                              | 63 (49)                               |
| Low intensity regimen <sup>&amp;</sup> | 43 (16)                            | 12 (9)                               | 31 (24)                               |
| Radiotherapy                           | 18 (7)                             | 13 (10)                              | 5 (4)                                 |
| Steroids only                          | 12 (5)                             | 10 (7)                               | 2 (1.5)                               |
| Other <sup>§</sup>                     | 4 (1.5)                            | 1 (0.7)                              | 3 (2)                                 |
| Unknown                                | 6 (2)                              | 4 (3)                                | 2 (2)                                 |

\*: Gemcitabine based n=67, intensive regimen n=27 (R-ICE n=13, R-ESHAP or DHAP n= 3, R-MINE n=3, reduced R-HyCVAD n=1, reduced BEAM n=1, Burkimab n=1, R-MACOB n=1, other n=4), bendamustine based n=22 (11 combined with polatuzumab), cyclophosphamide based n=11

&: Cyclophosphamide +/- prednisone +/- rituximab n=34, R-lenalidomide n=5, rituximab n=1, polatuzumab + rituximab n=1, ibrutinib n=1, brentuximab n=1

§: pembrolizumab n=1, pixantrona n=3

**B. Response rates reported to the different bridging therapies.**

|                              | <b>N</b> | <b>Complete<br/>Response</b> | <b>Partial<br/>Response</b> | <b>Stable<br/>Disease</b> | <b>Progressive<br/>Disease</b> |
|------------------------------|----------|------------------------------|-----------------------------|---------------------------|--------------------------------|
| <b>Chemotherapy</b>          | 116      | 7 (6)                        | 15 (12)                     | 16 (14)                   | 68 (59)                        |
| <b>Low intensity regimen</b> | 42       | 1 (2)                        | 3 (7)                       | 4 (10)                    | 22 (52)                        |
| <b>Polatuzumab-based</b>     |          |                              |                             |                           |                                |
| <b>PBR</b>                   | 11       | 2 (18)                       | 3 (27)                      | 2 (18)                    | 4 (37)                         |
| <b>PR</b>                    | 1        | 0 (0)                        | 0 (0)                       | 0 (0)                     | 1 (100)                        |
| <b>Radiotherapy</b>          | 18       | 0 (0)                        | 1 (6)                       | 4 (22)                    | 13 (72)                        |
| <b>Steroids</b>              | 12       | 0 (0)                        | 0 (0)                       | 1 (8)                     | 11 (92)                        |
| <b>Other/unknown</b>         | 10       | 0 (0)                        | 0 (0)                       | 0 (0)                     | 7 (70)                         |

PBR: polatuzumab-bendamustine-rituximab; PR: polatuzumab-rituximab

**Table S3.** A. Univariable analysis for PFS and OS. B. Logistic regression analysis for CRS grade  $\geq 3$  and ICANS grade  $\geq 3$ .

**A. Univariable analysis for PFS and OS**

|                                                | PFS                        |              | OS                         |              |
|------------------------------------------------|----------------------------|--------------|----------------------------|--------------|
|                                                | HR (95%CI)                 | p            | HR (95%CI)                 | p            |
| <i>CART type. axi-cel vs tisa-cel</i>          | 0.781 (0.586-1.040)        | 0.090        | 0.735 (0.527-1.024)        | 0.069        |
| <i>Sex. male vs female</i>                     | 0.992 (0.737-1.335)        | 0.958        | 1.025 (0.731-1.437)        | 0.885        |
| <i>Age</i>                                     | 0.994 (0.982-1.007)        | 0.385        | 1.000 (0.984-1.015)        | 0.946        |
| <i>HCT-CI. 0-2 vs &gt;2</i>                    | 0.930 (0.653-1.323)        | 0.685        | 0.944 (0.644-1.385)        | 0.770        |
| <i>Histology DLBCL vs other</i>                | 1.222 (0.881-1.694)        | 0.229        | 1.067 (0.745-1.528)        | 0.723        |
| <i>Cell of origin. GCB vs non-GCB</i>          | 0.780 (0.572-1.063)        | 0.116        | 0.754 (0.532-1.067)        | 0.111        |
| <i>Number prior lines. 2 vs &gt;2</i>          | 1.088 (0.946-1.251)        | 0.235        | 1.134 (0.974-1.321)        | 0.106        |
| <i>Primary Refractory. yes vs no</i>           | 1.440 (1.065-1.946)        | <b>0.018</b> | 1.647 (1.161-2.336)        | <b>0.005</b> |
| <i>Previous ASCT. yes vs no</i>                | 0.608 (0.438-0.843)        | <b>0.003</b> | 0.470 (0.310-0.713)        | <b>0.000</b> |
| <i>Disease status. PD vs other</i>             | 2.179 (1.361-3.490)        | <b>0.001</b> | 3.803 (1.728-8.372)        | <b>0.001</b> |
| <i>ECOG at apheresis 0-1 vs &gt;1</i>          | 2.529 (1.336-4.786)        | <b>0.004</b> | 3.885 (2.034-7.419)        | <b>0.000</b> |
| <i>Disease stage I-II vs III-IV</i>            | 1.773 (1.26-2.496)         | <b>0.001</b> | 1.896 (1.226-2.841)        | <b>0.002</b> |
| <i>R-IPi at apheresis</i>                      | <b>1.291 (1.134-1.470)</b> | <b>0.000</b> | <b>1.535 (1.316-1.791)</b> | <b>0.000</b> |
| <i>Bulky size at apheresis. yes vs no</i>      | 1.810 (1.322-2.479)        | <b>0.000</b> | 1.989 (1.397-2.831)        | <b>0.000</b> |
| <i>LDH at apheresis</i>                        | 2.444 (1.738-3.437)        | <b>0.000</b> | 3.140 (2.051-4.807)        | <b>0.000</b> |
| <i>CRP at apheresis</i>                        | 2.212 (1.54-3.178)         | <b>0.000</b> | 2.478 (1.644-3.735)        | <b>0.000</b> |
| <i>Platelets at apheresis</i>                  | 0.998 (0.996-1.000)        | <b>0.061</b> | 0.996 (0.993-1.000)        | <b>0.026</b> |
| <i>Bridging therapy. yes vs no</i>             | 1.594 (1.023-2.484)        | <b>0.040</b> | 2.665 (1.423-4.993)        | <b>0.002</b> |
| <i>Disease status at LD. PD vs other</i>       | 2.797 (1.891-4.139)        | <b>0.000</b> | 2.500 (1.508-4.142)        | <b>0.000</b> |
| <i>Bulky size at LD. yes vs no</i>             | 1.946 (1.386-2.733)        | <b>0.000</b> | 1.916 (1.264-2.903)        | <b>0.002</b> |
| <i>Extranodal at LD &gt;2 sites. yes vs no</i> | 1.450 (1.297-1.622)        | <b>0.000</b> | 1.441 (1.262-1.646)        | <b>0.000</b> |
| <i>ECOG at LD. 0-1 vs &gt;1</i>                | 3.056 (1.572-5.944)        | <b>0.001</b> | 3.072 (1.600-5.897)        | <b>0.001</b> |
| <i>R-IPi at LD</i>                             | <b>1.301 (1.152-1.470)</b> | <b>0.000</b> | <b>1.343 (1.142-1.580)</b> | <b>0.000</b> |
| <i>Platelets at LD</i>                         | 0.999 (0.997-1.001)        | 0.269        | 0.997 (0.995-1.000)        | 0.063        |
| <i>LDH at LD</i>                               | 2.233 (1.586-3.144)        | <b>0.000</b> | 2.598 (1.669-4.043)        | <b>0.000</b> |
| <i>CRP at LD</i>                               | 2.495 (1.644-3.786)        | <b>0.000</b> | 3.190 (1.877-5.422)        | <b>0.000</b> |
| <i>LDH pre infusion</i>                        | 2.179 (1.463-3.245)        | <b>0.000</b> | 2.175 (1.324-3.571)        | <b>0.002</b> |
| <i>CRP pre infusion</i>                        | 2.664 (1.570-4.521)        | <b>0.000</b> | 4.497 (2-128-9.5)          | <b>0.000</b> |
| <i>CRS. yes vs no</i>                          | 0.740 (0.514-1.064)        | <b>0.104</b> | 1.071 (0.665-1.727)        | 0.777        |
| <i>CRS 3-4. yes vs no</i>                      | 1.533 (0.752-3.126)        | 0.239        | 2.615 (1.250-5.470)        | <b>0.011</b> |
| <i>CRS tocilizumab. yes vs no</i>              | 0.886 (0.644-1.218)        | 0.455        | 1.337 (0.907-1.971)        | 0.143        |
| <i>CRS steroids. yes vs no</i>                 | 0.895 (0.584-1.372)        | 0.611        | 1.219 (0.721-2.062)        | 0.460        |
| <i>ICANS. yes vs no</i>                        | 0.974 (0.679-1.396)        | 0.884        | 1.450 (0.942-2.234)        | 0.092        |
| <i>ICANS 3-4. yes vs no</i>                    | 1.108 (0.620-1.978)        | 0.730        | 1.690 (0.842-3.392)        | 0.140        |
| <i>ICANS tocilizumab. yes vs no</i>            | 0.896 (0.579-1.388)        | 0.623        | 1.475 (0.884-2.462)        | 0.137        |
| <i>ICANS steroids. yes vs no</i>               | 0.990 (0.660-1.483)        | 0.960        | 1.396 (0.846-2.301)        | 0.191        |

## B. Univariable logistic regression analysis for CRS grade $\geq 3$ and ICANS grade $\geq 3$

|                                       | CRS grade $\geq 3$   |              | ICANS grade $\geq 3$ |              |
|---------------------------------------|----------------------|--------------|----------------------|--------------|
|                                       | OR (95%CI)           | P            | OR (95%CI)           | P            |
| <i>CART type. axi-cel vs tisa-cel</i> | 1.330 (0.516-3.429)  | 0.555        | 4.400 (1.731-11.180) | <b>0.002</b> |
| <i>Age</i>                            | 1.001 (0.995-1.050)  | 0.970        | 1.004 (0.968-1.041)  | 0.836        |
| <i>HCT-CI. 0-2 vs &gt;2</i>           | 0.401 (0.090-1.795)  | 0.232        | 1.106 (0.447-2.733)  | 0.828        |
| <i>Histology DLBCL vs other</i>       | 0.719 (0.395-1.309)  | 0.281        | 0.914 (0.609-1.372)  | 0.665        |
| <i>Cell of origin. GCB vs non-GCB</i> | 0.671 (0.239-1.882)  | 0.448        | 1.438 (0.572-3.615)  | 0.440        |
| <i>Number prior lines. 2 vs &gt;</i>  | 1.067 (0.676-1.684)  | 0.782        | 0.534 (0.336-0.848)  | <b>0.008</b> |
| <i>Primary Refractory. yes vs o</i>   | 1.270 (0.482-3.345)  | 0.628        | 1.105 (0.508-2.404)  | 0.801        |
| <i>LDH at apheresis</i>               | 2.547 (0.817-7.938)  | <b>0.107</b> | 0.984 (0.438-2.206)  | 0.968        |
| <i>CRP at apheresis</i>               | 1.779 (0.537-5.895)  | 0.346        | 0.539 (0.228-1.271)  | <b>0.158</b> |
| <i>Leucocyte count at apheresis</i>   | 0.898 (0.701-1.150)  | 0.392        | 1.040 (0.940-1.151)  | 0.449        |
| <i>Lymphocyte count at apheresis</i>  | 0.922 (0.581-1.463)  | 0.730        | 1.020 (0.774-1.346)  | 0.886        |
| <i>Platelet count at apheresis</i>    | 0.993 (0.984-1.002)  | <b>0.121</b> | 1.000 (0.997-1.003)  | 0.927        |
| <i>Bridging therapy. yes vs no</i>    | 2.158 (0.481-9.683)  | 0.315        | 2.361 (0.685-8.131)  | <b>0.173</b> |
| <i>Disease status PD vs other</i>     | 1.296 (0.439-3.830)  | 0.639        | 1.219 (0.504-2.950)  | 0.660        |
| <i>Bulky at LD. yes vs no</i>         | 1.985 (0.760-5.185)  | 0.162        | 1.250 (0.534-2.925)  | 0.608        |
| <i>Extranodal at LD. 0-2 vs &gt;2</i> | 1.012 (0.7701-331)   | 0.930        | 1.225 (0.890-1.686)  | 0.213        |
| <i>ECOG at LD. 0-1 vs &gt;1</i>       | 6.756 (2.082-21.920) | <b>0.001</b> | 2.658 (0.803-8.800)  | <b>0.109</b> |
| <i>R-IPI at LD. 0-2 vs &gt;2</i>      | 2.717 (0.829-8.907)  | <b>0.099</b> | 2.315 (0.901-5.947)  | 0.081        |
| <i>Platelets at LD</i>                | 1.001 (0.996-1.006)  | 0.682        | 1.002 (0.992-1.006)  | 0.337        |
| <i>LDH at LD</i>                      | 6.299 (1.411-28.120) | <b>0.016</b> | 0.924 (0.426-2.001)  | 0.840        |
| <i>CRP at LD</i>                      | 2.705 (0.761-9.624)  | <b>0.124</b> | 1.961 (0.760-5.057)  | <b>0.164</b> |
| <i>LDH at infusion</i>                | 1.026 (0.236-4.459)  | 0.973        | 1.461 (0.569-3.749)  | 0.430        |
| <i>CRP at infusion</i>                | 2.162 (0.480-9.740)  | 0.315        | 1.591 (0.524-4.832)  | 0.413        |

Abbreviations: HCT-CI, Hematopoietic Cell Transplantation-Comorbidity Index; GCB, germinal center B-cell; ASCT, autologous stem cell transplantation; PD, progressive disease; R-IPI, revised international prognostic index; LDH, lactate dehydrogenase; CRP, c-reactive protein; CRS, cytokine release syndrome; ICANS, immune effector cell-associated neurotoxicity syndrome; LD, lymphodepletion.

**Table S4.** Infections within the first six months after infusion in axicabtagene ciloleucel and tisagenlecleucel-treated patients.

|                        | Total infused (n=261) | Axi-cel infused (n=134) | Tisa-cel infused (n=127) |
|------------------------|-----------------------|-------------------------|--------------------------|
| Infectious episodes, n | 91                    | 56                      | 35                       |
| Bacterial, n (%)       | 54 (59)               | 32 (57)                 | 22 (63)                  |
| Mild                   | 3 (3)                 | 1 (2)                   | 2 (6)                    |
| Moderate               | 9 (11)                | 3 (5)                   | 6 (17)                   |
| Severe                 | 37 (41)               | 25 (45)                 | 12 (34)                  |
| Life-threatening       | 4 (4)                 | 2 (4)                   | 2 (6)                    |
| Fatal                  | 1 (1)                 | 1 (2)                   | 0 (0)                    |
| Viral, n (%)           | 31 (34)               | 22 (36)                 | 9 (26)                   |
| Mild                   | 13 (14)               | 7 (13)                  | 6 (17)                   |
| Moderate               | 6 (7)                 | 4 (7)                   | 2 (6)                    |
| Severe                 | 5 (5)                 | 4 (7)                   | 1 (3)                    |
| Life-threatening       | 6 (7)                 | 6 (11)                  | 0 (0)                    |
| Fatal                  | 1 (1)                 | 1 (2)                   | 0 (0)                    |
| Fungal, n (%)          | 6 (7)                 | 2 (4)                   | 4 (11)                   |
| Mild                   | 1 (1)                 | 0 (0)                   | 1 (3)                    |
| Moderate               | 1 (1)                 | 1 (2)                   | 0 (0)                    |
| Severe                 | 2 (2)                 | 0 (0)                   | 2 (6)                    |
| Life-threatening       | 1 (1)                 | 0 (0)                   | 1 (3)                    |
| Fatal                  | 1 (1)                 | 1 (2)                   | 0 (0)                    |

**Figure S1.** Reasons for not undergoing CAR T-cell infusion for patients intended to be treated with axi-cel and tisa-cel

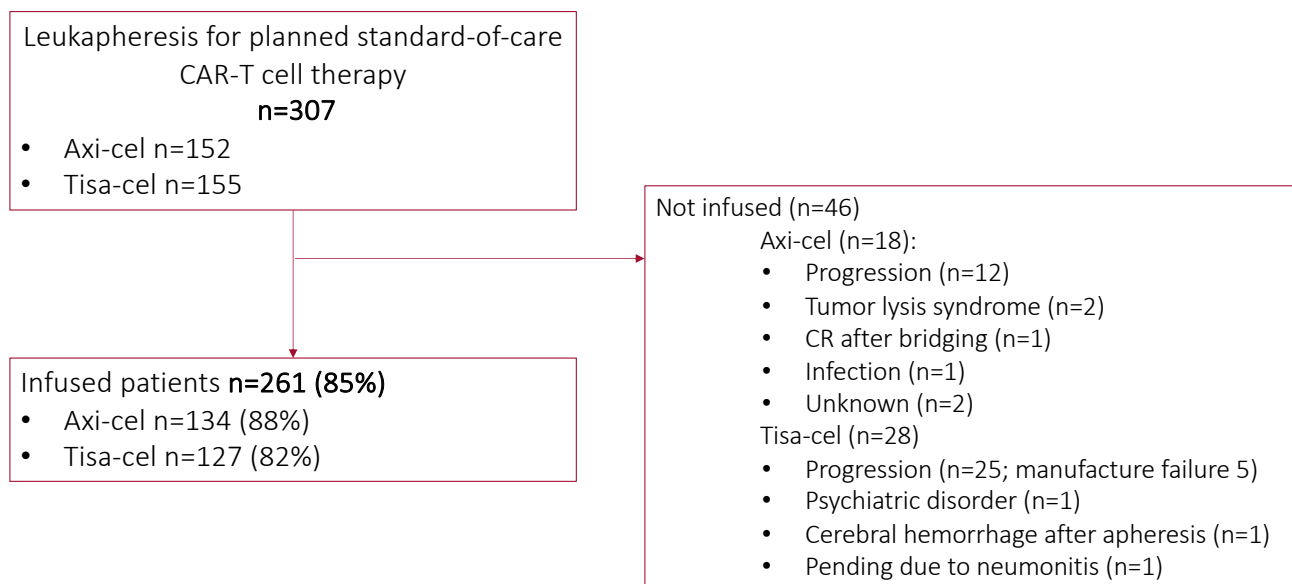

**Figure S2.** Timeline of neurotoxicity (ICANS) after infusion of tisagenlecleucel (A) and axicabtagene ciloleucel (B).

**A**

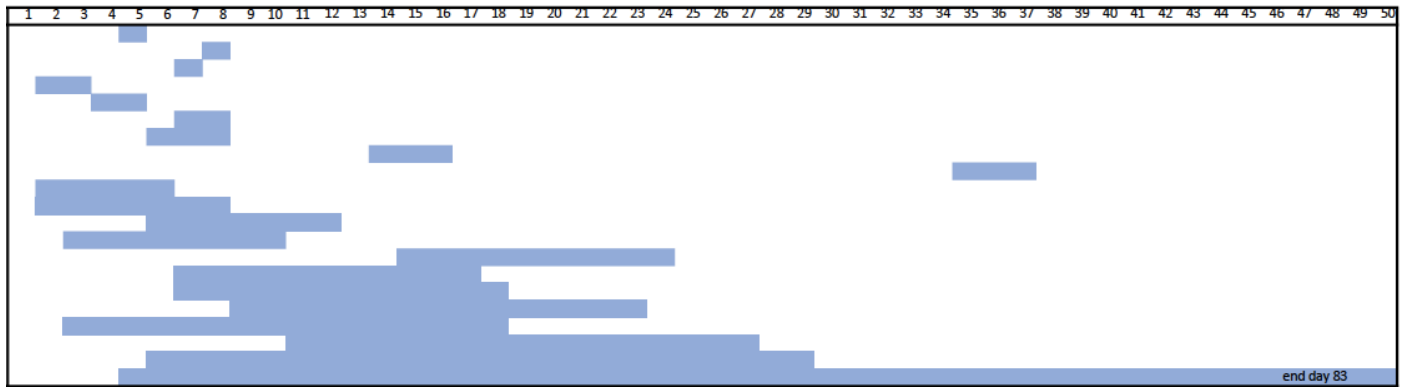

**B**

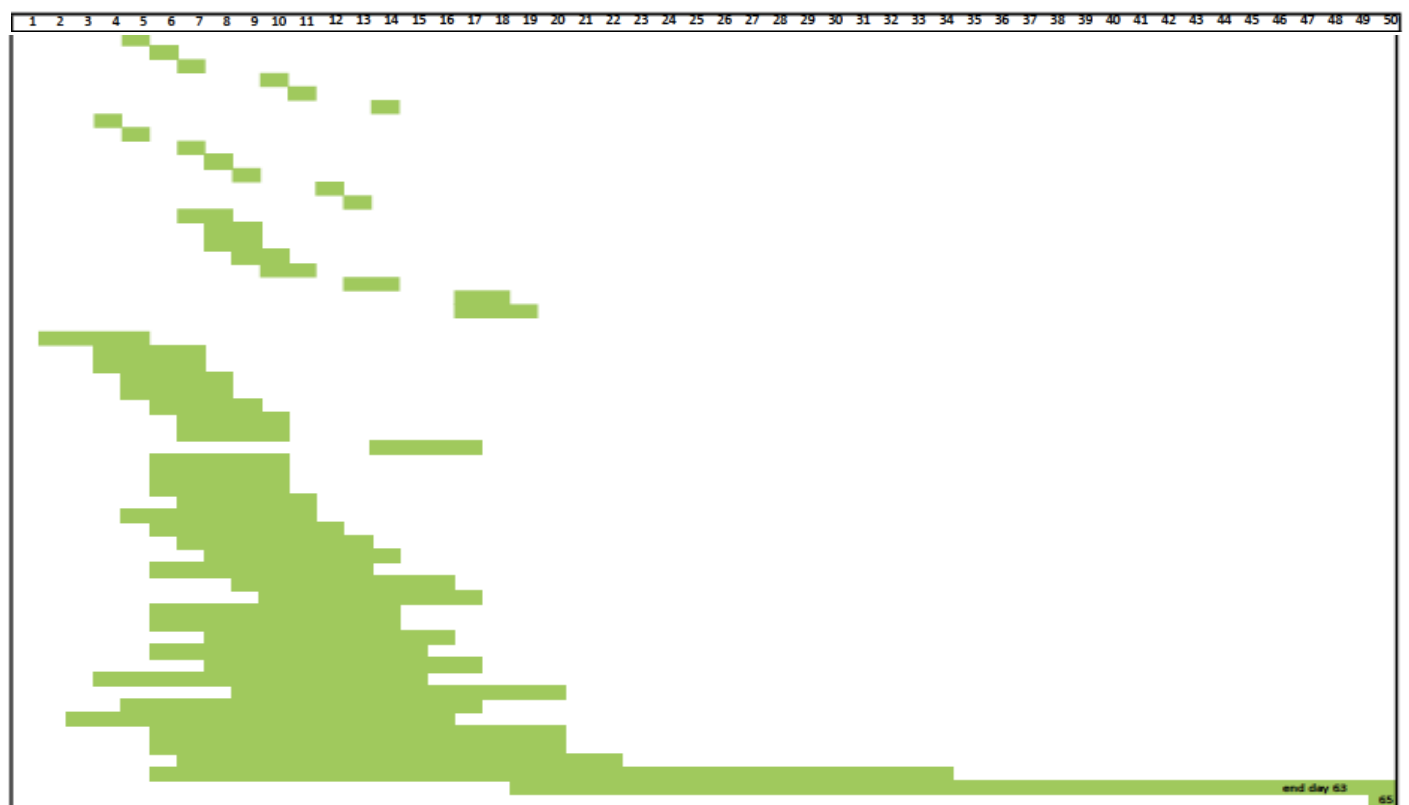

**Figure S3.** Non-relapse mortality causes in axicabtagene ciloleucel and tisagenlecleucel–treated patients

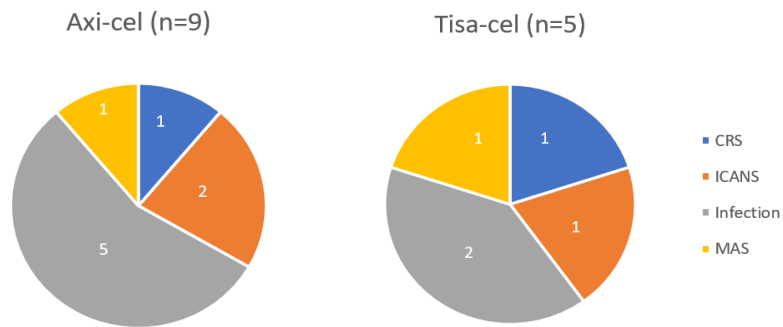

**Figure S4.** Response assessment in axicabtagene ciloleucel and tisagenlecleucel–treated patients at days 30, 100 and 180 after infusion.

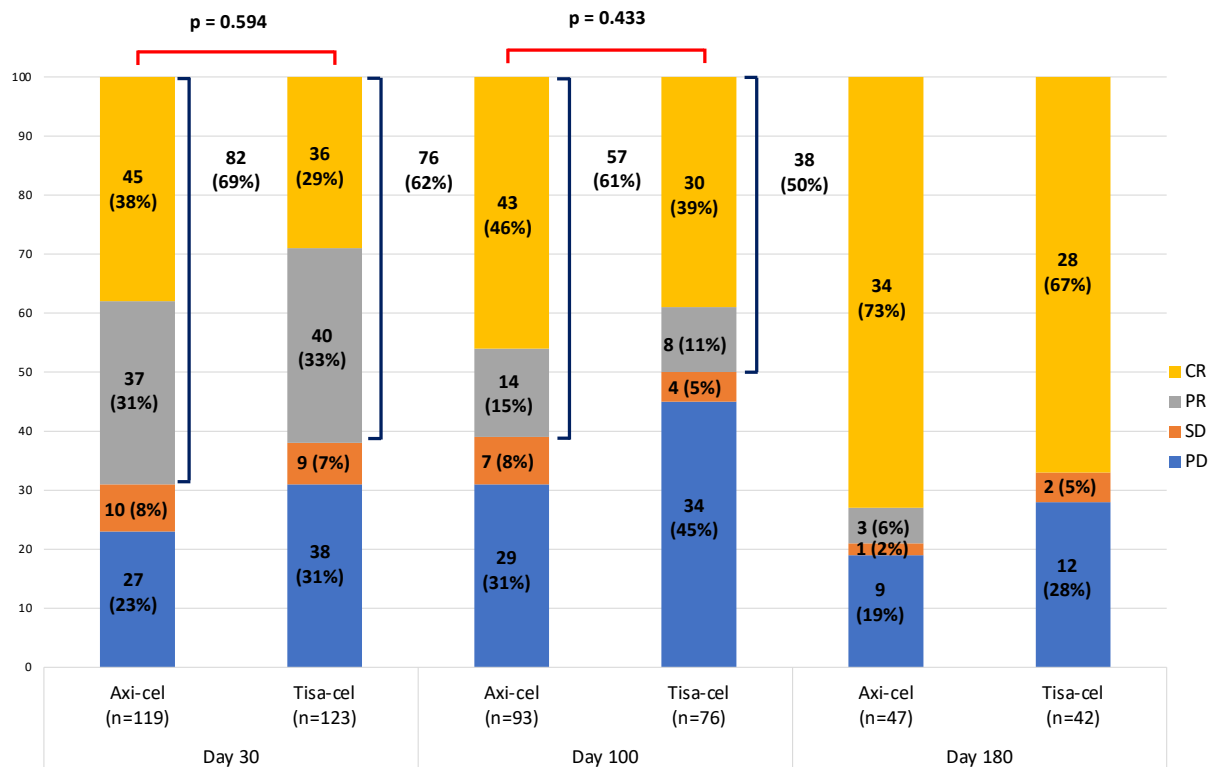

Abbreviations: CR, complete response; PR, partial response; SD: stable disease; PD: progressive disease



**Figure S5.** Progression free survival (PFS) and Overall survival (OS) from apheresis of patients intended to be treated with axicabtagene ciloleucel and tisagenlecleucel.

**A**

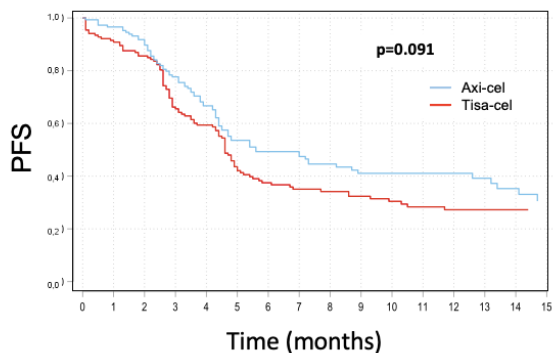

Number at risk

|          |     |     |     |     |    |    |    |    |    |    |    |    |    |    |    |    |
|----------|-----|-----|-----|-----|----|----|----|----|----|----|----|----|----|----|----|----|
| Tisa-cel | 155 | 142 | 130 | 98  | 85 | 58 | 48 | 41 | 38 | 35 | 30 | 26 | 25 | 24 | 23 | 21 |
| Axi-cel  | 152 | 147 | 133 | 108 | 90 | 65 | 54 | 53 | 44 | 33 | 30 | 26 | 25 | 20 | 16 | 12 |

**B**

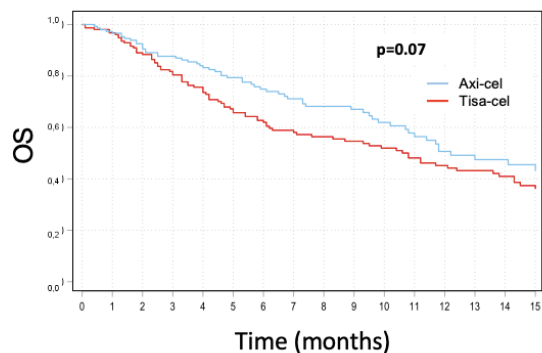

|          |     |     |     |     |     |    |    |    |    |    |    |    |    |    |    |    |
|----------|-----|-----|-----|-----|-----|----|----|----|----|----|----|----|----|----|----|----|
| Tisa-cel | 155 | 150 | 137 | 121 | 109 | 91 | 83 | 71 | 66 | 62 | 56 | 50 | 46 | 41 | 36 | 30 |
| Axi-cel  | 152 | 148 | 135 | 108 | 113 | 94 | 81 | 75 | 67 | 58 | 48 | 41 | 34 | 29 | 24 | 19 |
